# Supplementary material for: Derivate Isocorydine (d-ICD) Suppresses Migration and Invasion of Hepatocellular Carcinoma Cell by Downregulating ITGA1 Expression
Source: PubMed Central journal article supplement (PMC5372530; doi:10.3390/ijms18030514), 2017-02-27
Supplement: ijms-18-00514-s001.pdf [file ijms-18-00514-s001.pdf]

# Supplementary Materials: Derivate Isocorydine (d-ICD) Suppresses Migration and Invasion of Hepatocellular Carcinoma Cell by Downregulating ITGA1 Expression

Xiaoqin Liu, Hua Tian, Hong Li, Chao Ge, Fangyu Zhao, Ming Yao and Jinjun Li

**Table S1.** Antibodies used in this study.

| Antibody       | Host            | Dilution       | Company         |
|----------------|-----------------|----------------|-----------------|
| ITGA1          | Goat polyclonal | 1:400 for WB   | R&D system      |
| E2F1           | Mouse mAb IgG2a | 1:100 for WB   | Santa Cruz      |
| ITGB1          | Mouse mAb IgG2a | 1:200 for WB   | Santa Cruz      |
| Cleaved-PARP   | Rabbit IgG2a    | 1:500 for WB   | Cell Signalling |
| $\beta$ -actin | Mouse mAb       | 1:10000 for WB | Sigma           |

WB: Western blotting.

**Table S2.** The PCR primers for RT-PCR.

| Name  | Primer Sequence                       |
|-------|---------------------------------------|
| ITGA1 | Forward: 5'- CAGCAAGAAAGGAGGCATTC -3' |
|       | Reverse: 5'- TTTCTCGGTTATAGCTGCC -3'  |
| E2F1  | Forward: 5'- CCGTGGACTCTTCGGAGAAC -3' |
|       | Reverse: 5'- ATCCACCTACGGTCTCCTC -3'  |
| GAPDH | Forward: 5'- AGAAGGCTGGGGCTCATTTG -3' |
|       | Reverse: 5'- AGGGGCCATCCACAGTCTTC -3' |
| CHIP  | Forward: 5'- CGGAGAACGAGATCACCTCT -3' |
|       | Reverse: 5'- CTCTAAATGCGCTCCACGC -3'  |

**Table S3.** The sequences of ITGA1 ShRNA.

| Name         | Primer Sequence                                                          |
|--------------|--------------------------------------------------------------------------|
| ShNC         | TTCTCCGAACGTGTCACGT                                                      |
| Sh-ITGA1-1   | Forward:5'-CCGGCCCTAGATTCACCTAAGACAAA                                    |
|              | CTCGAGTTTGTCTTAGTGAATCTAGGGTTTTTG -3'                                    |
|              | Reverse:5'-AATTCAAAAACCCTAGATTCACCTAAGACAAA                              |
| Sh-ITGA1-2   | GACAAACTCGAGTTTGTCTTAGTGAATCTAGGG -3'                                    |
|              | Forward:5'-CCGGCCCTCGAAACACAACCTTTAACTCGAGTTAAAGGTTG                     |
|              | TGTTTCGAGGGTTTTTG -3'                                                    |
|              | Reverse:5'-AATTCAAAAACCCTCGAAACACAACCTTTAACTCGAGTTAAAGGTTGTTTTCGAGGG -3' |
| SiRNA-E2F1-1 | Forward:5'- GGACCUGGAAACUGACCAUTT-3'                                     |
|              | Reverse:5'-AUGGUCAGUUUCCAGGUCCTT-3'                                      |
| SiRNA-E2F1-2 | Forward:5'- GCAUCUAUGACAUCACCAATT-3'                                     |
|              | Reverse:5'- UUGGUGAUGUCAUAGAUGCTT-3'                                     |

**Table S4.** Primers for vector constructs.

| Name                       | Primer Sequence                                                                                                                 |
|----------------------------|---------------------------------------------------------------------------------------------------------------------------------|
| E2F1:                      | Forward: 5'- GCGGATCCATGGCCTTGGCCGGG -3'<br>Reverse: 5'- CCGGAATTCTCAGAAATCCAGGGGGGTGAGG -3'                                    |
| ITGA1-promoter (P1-1822bp) | Forward: 5'- GGGTACCATGGCCTTCAACCTCCTTGGGT -3'<br>Reverse: 5'- CCGCTCGAGGTGCTGCCTCACTCCTACT -3'                                 |
| ITGA1-promoter (P2-830bp)  | Forward: 5'- GGGTACC CCACCCTTTAACCACGAAT -3'<br>Reverse: 5'- CCGCTCGAGAGCAGGCGACAGCGACCCCTGG -3'                                |
| ITGA1-promoter (P3-350bp)  | Forward: 5'- GGGTACCTCCTGCCCTGCGAACCAG -3'<br>Reverse: 5'- CCGCTCGAGGTGCTGCCTCACTCCTACT -3'                                     |
| ITGA1-promoter (PM-mutant) | Forward: 5'- GGGTACC CCACCCTTTAACCACGAAT -3'<br>Reverse: 5'- CCGCTCGAGCTATAGCCGCAGTTACG<br>TGTTTAGGCTAAAGTCCACGGGCTGTAGAAGC -3' |

**Table S5.** ITGA1 promoter sequence.

|                           |                                                      |
|---------------------------|------------------------------------------------------|
| <b>&gt;ITGA1 promoter</b> |                                                      |
| -1521                     | ATGGCCTTCAACCTCCTTGGGTCTGCCACCCCATTTTTGACGCTCCTTAA   |
| -1470                     | ACTTCTTCAACTTTTGTCTTCTCCAGCTTTTAGTTGCTGTGATCCTCTATCT |
| -1418                     | GGCAATGTATCCAGTGAACCCTGTGGGCTTCTTCCCTTCCGTCCCTCGTG   |
| -1367                     | TTACCTGTTCTGTGCTACCTGTGTTGCGTTCTGCTCAACGAACCCTCCTTT  |
| -1317                     | GGGTGGCACTCTTGTCTGCTAGCCCTAGTTCTGCTAGAGATGCTCAAT     |
| -1265                     | TAGTTGTTGAGTTGAAGAATTGAATTGAACTGTTTCCCTCAGATTCCTCTAA |
| -1213                     | ACACAAATCCACTTATTCTTTCTGTCTTTGAAATTCTCAAACCGCTAAGAC  |
| -1162                     | ACAGCTATTTTGAATAAGCCAGCATTGGTTGAAGCTAGGGTGAATATGGC   |
| -1112                     | TTTTGACTCAGAGAGGTTGTTCAACTCACCAGGAAAGGGAAGCATTGCAA   |
| -1060                     | GTTCTAAGCACTTCTGGACTCTTAATGCATTTTCACTCGTGAAAGTTTCAA  |
| -1009                     | GCAAGAAAAAATAAAGTAGTGCCCGAGTTCTTTATTAGATTCAATTACC    |
| -958                      | AGCGTACAAACATCCTAATCACTTAAACAAAATAGCCACACACATTCCA    |
| -906                      | TTTCCAAGGAGGCTGCTTTTCTTCTCTCTTCCCTTCTCGCTCTCCCTCTTA  |
| -852                      | CTGTTTTTCTCCGTCTTGCTTCTCCTTTTCTCCCCTTATCCTAGTTATCTC  |
| -801                      | AAAGAAAAGCTTATCTGCAACCACCCTTTAACCACGAATTACCATAAACGA  |
| -752                      | AGCAACCCCCCACCACCCATAAGCGAAAGCAAAGCCCTCAGTGGAGC      |
| -703                      | CTGTCGGGGTGGTGGGACGCCCCCTTTCGTGCAAACGACTTCACGGT      |
| -654                      | GAATTTCAAGTGTCCGCAGGGGATGGAAGGGGGGATTCCAGATCCTCGC    |
| -604                      | ATTTTACAGACGGCCTAATCCCTCTGCGCAATGGACCCGGGAAAGCTGC    |
| -555                      | CTCCCGTTAAGGGCGCCAGGCACTGTCAAAGCGCCCTCCCTGCCCGGG     |
| -507                      | CCGGGAGAAGTAAGGGGTGTGAAGGCGGAGCCACTGGGCTGGCAACAC     |
| -457                      | CCTCCCGAAGGTCCAGCCCTTACCCGCTTCTACCACCTTAGGGGATTT     |
| -407                      | GGCCCGGAGAACGAGATCACCTCTCAATGAAAGGCAGATGTCCCTTTAA    |
|                           | E2F1 binding site                                    |
| -357                      | GGTTTGCTTCTACAGCCCGTGGACTTTAGCCTAAACACGGACCCGCGAAG   |
| -307                      | CTGGCTTTATTTGTCCATGTCTCGGACAGAGCCTGGGAAGCTGCCAGTGA   |
| -258                      | GATTTACAGAGACCAAGAGCGCGAAGGGGCGGGCGATGTGGCAATCCGTC   |
| -208                      | TGGGATGTGAAAAGCGTGGAGCGCATTTAGAGGAATTCGACGAAAACACA   |
| -159                      | GGAAATCACTCCTCTCCCCTCCTGGGCGCCGCTGCCACTGGGGCAGAG     |
| -111                      | GACTGGGAACCGCGCAGCGGATAAGTGGCCAGCCAGAGAGCGCAG        |
| -63                       | CTCCCGCGCCCGGTCTGCCCTGCGAACCAGCGCGGCCCCCTGGCGCT      |
|                           | Transcriptional initiation site                      |
| -15                       | GAGGCTGCTCCGGCCATGCCCCCTCGGCCCGCGCCCGCCAGGGGTC       |
| +34                       | GCTGTGCCTGCTGCTGGCTCCTCACTGGTGAAGCGACTCGCTTTTCTCTG   |
| +84                       | AGCATCTCCTGCTCGCGGGCTTGGGGCTTGGAGCGGGGAGGGAGGTCT     |

```

+134 CAGAGCCATGGGCCAGATAGGAAGAGAGAGCGCCCATCCACTTTCGGGC
+182 ATCCAGGTA CT CAGGCCAGGCTACGGGGCAGGCAGGAGTTTCGCGTTC
+ +232 TGGTTTTGATATGAATTAGTTTTTCGTGTCTCTCAAAGTCCTTCACCCTAGG
+283 AGTAGGAGTGAGGCAGCAC
    
```

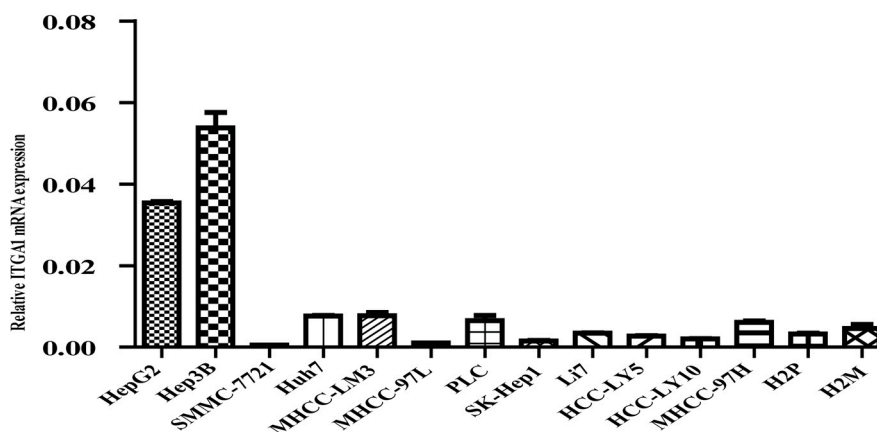

**Figure S1.** RT-PCR analyzed endogenous ITGA1 mRNA expression in various hepatocellular carcinoma (HCC) cell lines.

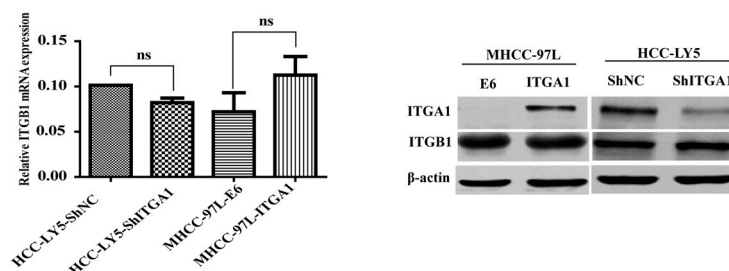

**Figure S2.** The mRNA and protein level of ITGB1 in ITGA1 overexpression HCC cells and ITGA1 silencing HCC cells were detected by RT-PCR and western blot. Results showed that the expression change of ITGA1 have no impact on ITGB1 in HCC cells. (“ns” indicates no statistical significance).

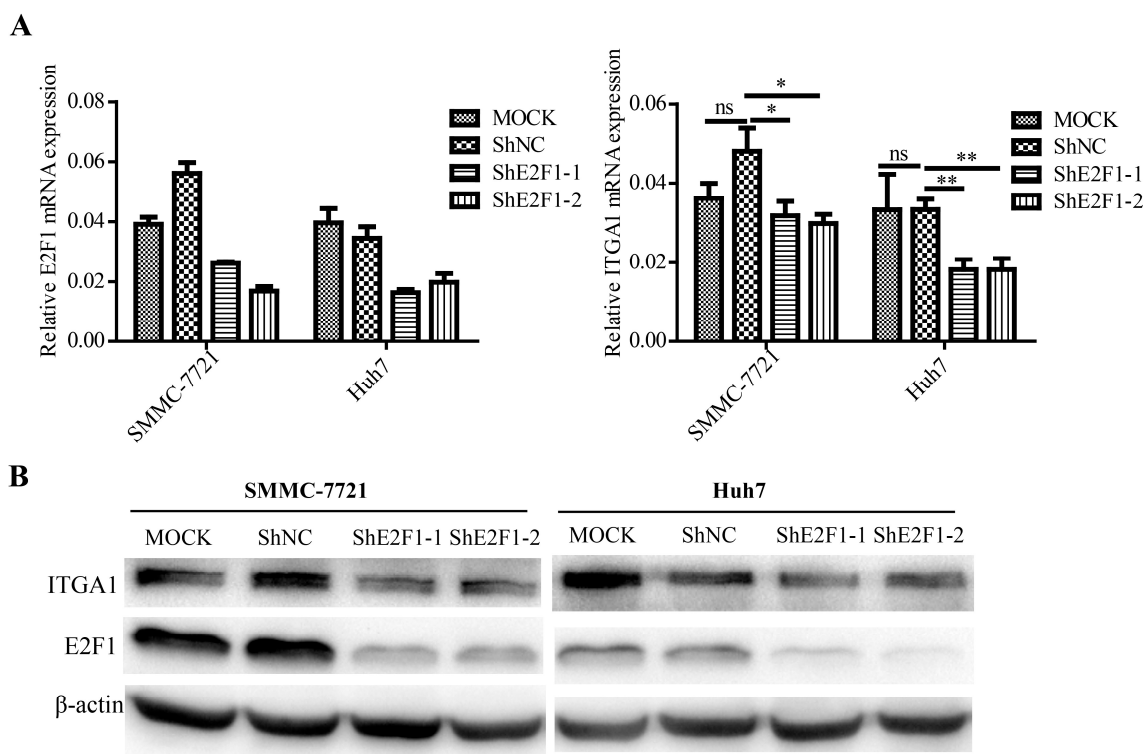

**Figure S3.** (A,B) RT-PCR and western blotting analyzed E2F1 and ITGA1 expression in HCC cells with transiently transfected E2F1 SiRNA. (“ns” means no significance, \*  $p < 0.05$ , \*\*  $p < 0.01$ ).

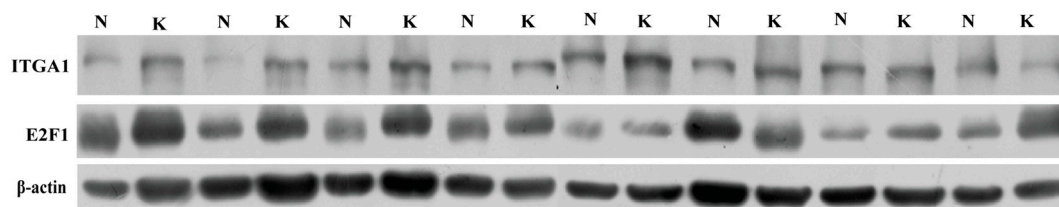

**Figure S4.** Western blot analyzed the expression of ITGA1 and E2F1 in HCC tissue. The result showed that the expression of ITGA1 positive related to the expression of E2F1 in HCC.

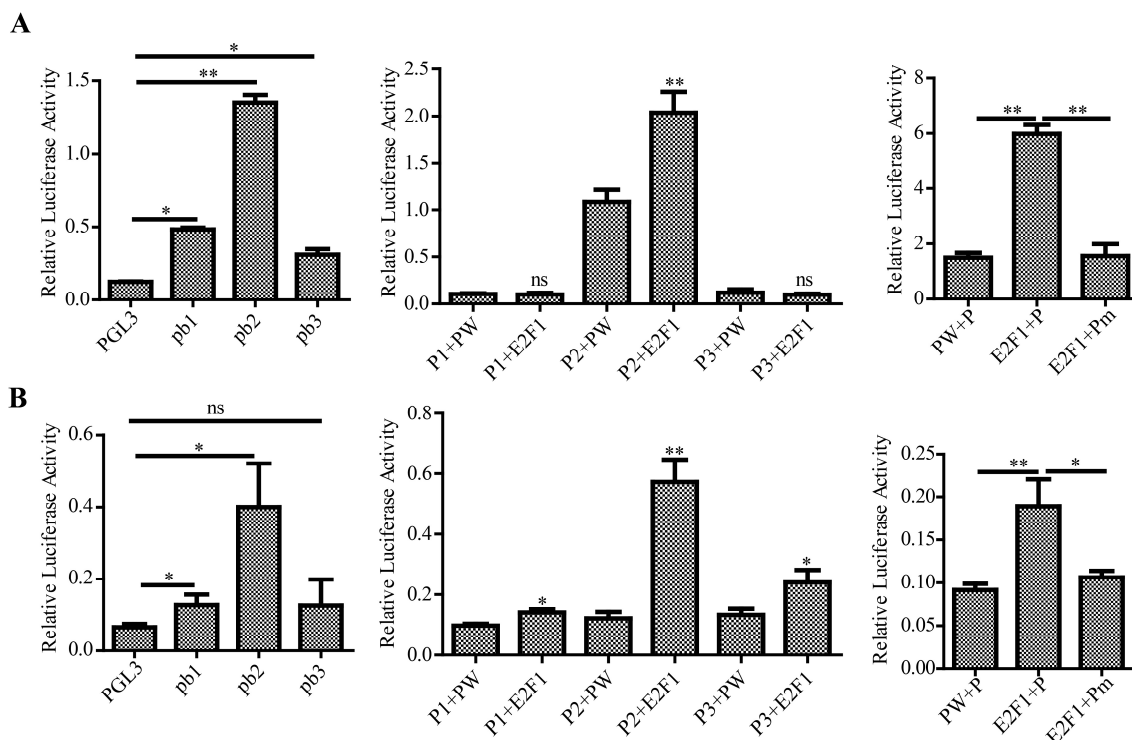

**Figure S5.** E2F1 binds to ITGA1 promoter in HCC cells. (A,B) Dual luciferase reporter gene studies were performed to detect the ITGA1 promoter and its truncated and mutant construct activity in SMMC-7721 and Huh7 cells. (“ns” means no significance, \*  $p < 0.05$ , \*\*  $p < 0.01$ ).

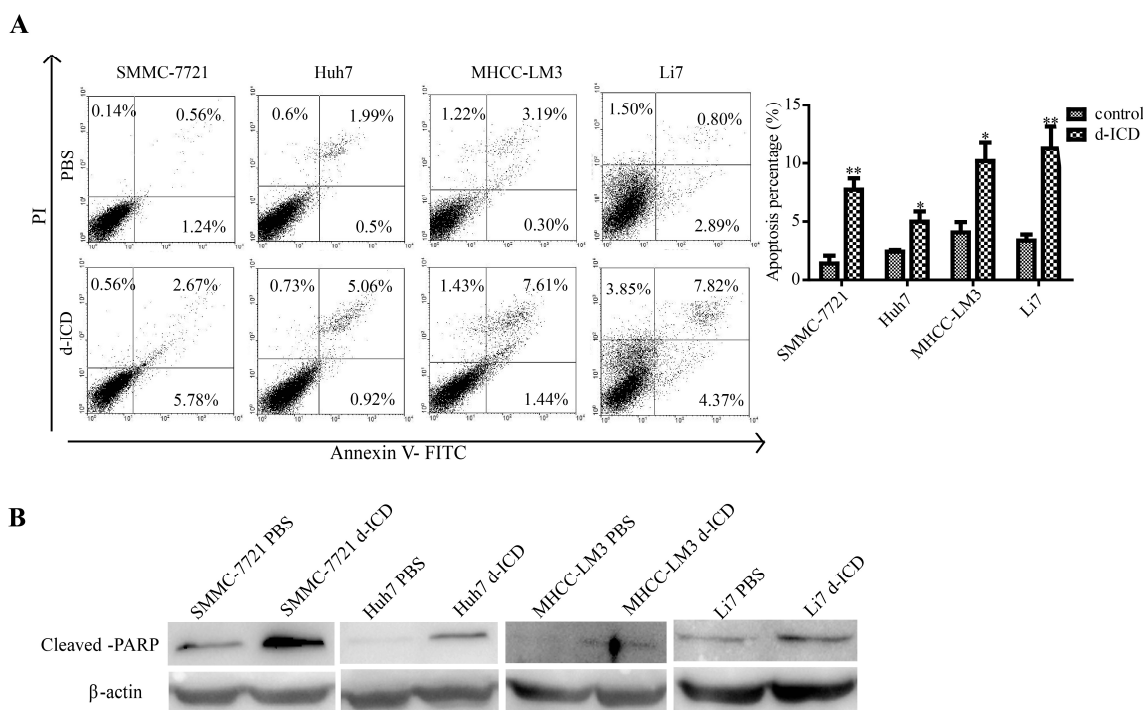

**Figure S6.** Derivate isocorydine (d-ICD) mildly induce HCC cell apoptosis during migration assay. (A) Following the treatment of SMMC-7721, Huh7, MHCC-LM3, Li7 cells with d-ICD for 48h, cells were stained by Annexin V-FITC and PI, and apoptosis cells were detected by FACS analysis. (B) Western blot analysis of cleaved PARP in SMMC-7721, Huh7, MHCC-LM3, and Li7 cells following d-ICD treatment 48h (\*  $p < 0.05$ , \*\*  $p < 0.01$ ).

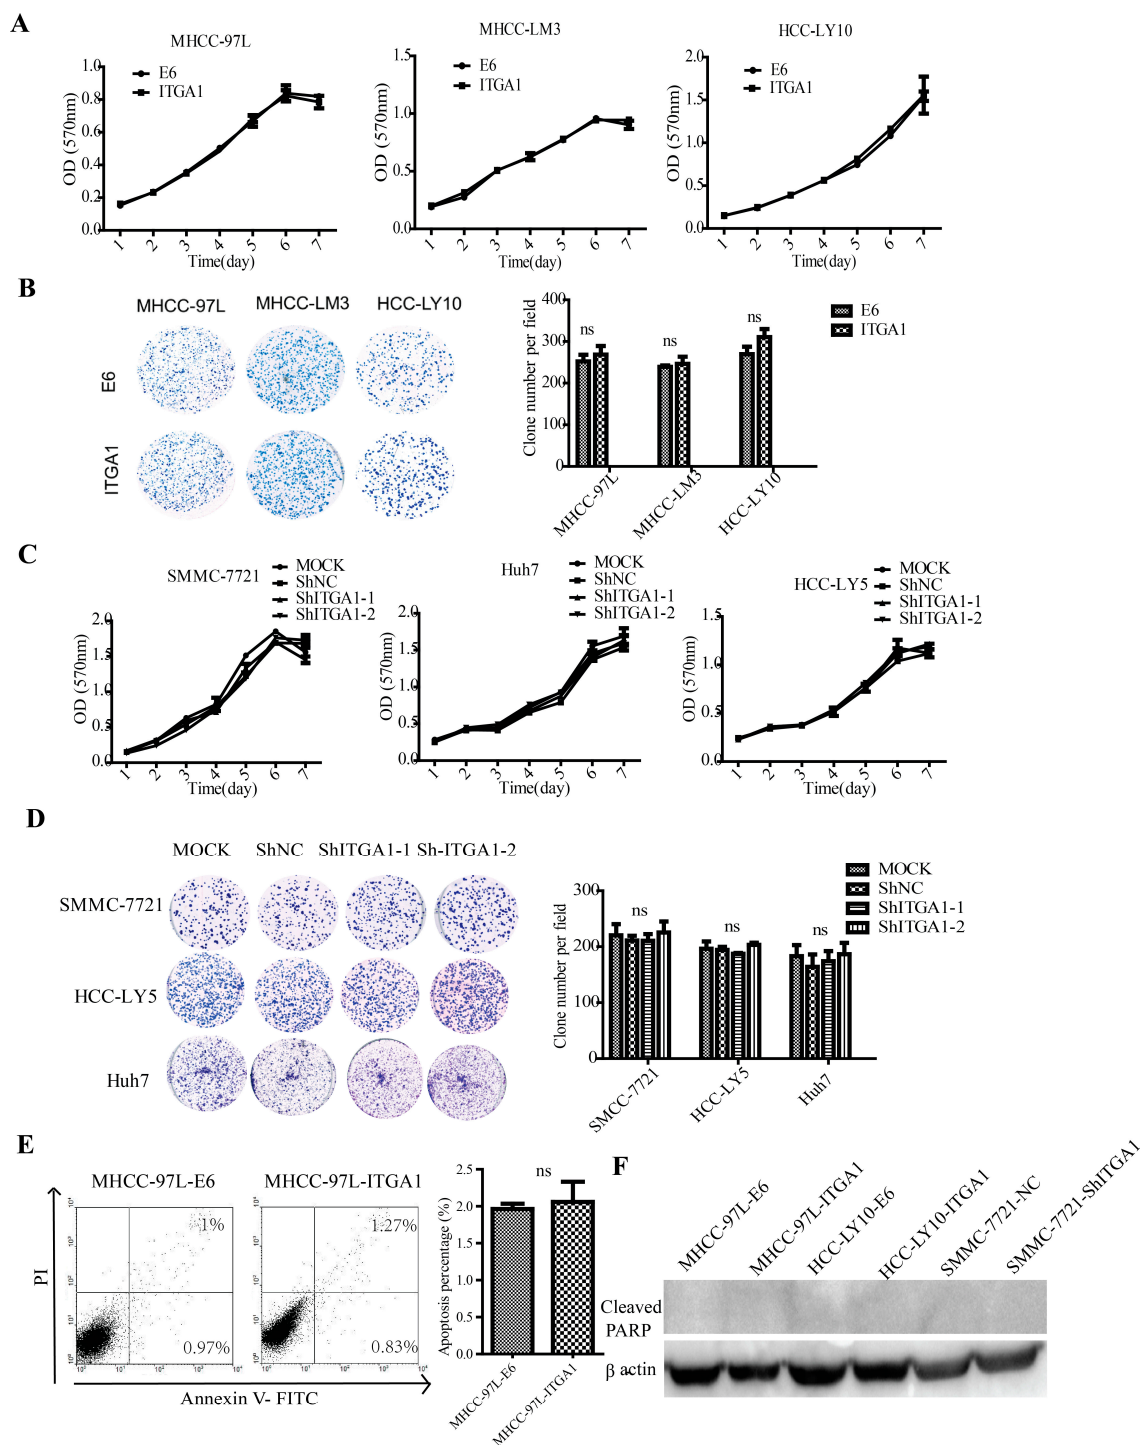

**Figure S7.** ITGA1 has no obvious effect on HCC cells proliferation or apoptosis in vitro. (A,B) MTT assay and clone formation assay were performed to analyze ITGA1 over-expression HCC cell proliferation ability, and the statistical analysis showed no significance between the two group. (C,D) MTT assay and clone formation assay were performed to analyze ITGA1 silencing-expression HCC cell proliferation ability, and the statistical analysis showed no significance between MOCK, ShNC, and ShITGA1 group. (E) Annexin v-FITC and PI double staining and FACS analyzed apoptosis cells in ITGA1 overexpression MHCC-97L cell and the control group cell, no difference was observed. (F) Western blot analysis of cleaved PARP in MHCC-97L and HCC-LY10 with ITGA1 overexpression and SMMC-7721 with ITGA1 silencing (“ns” means no significance).
